# Supplementary material
Source: PubMed Central journal article supplement (PMC5604743)
Supplement: 41541_2017_11_MOESM1_ESM.pdf [file 41541_2017_11_MOESM1_ESM.pdf]

1 **(SUPPLEMENTARY DATA)**

2

3 **Robust antibody and CD8<sup>+</sup> T-cell responses induced by *P. falciparum* CSP adsorbed**  
4 **to cationic liposomal adjuvant CAF09 confer sterilizing immunity against**  
5 **experimental rodent malaria infection**

6

7 Diego A. Espinosa,<sup>a\*</sup> Dennis Christensen,<sup>b</sup> Christian Muñoz,<sup>a</sup> Sanjay Singh,<sup>c</sup> Emily  
8 Locke,<sup>d</sup> Peter Andersen,<sup>b</sup> Fidel Zavala<sup>a#</sup>

9

10 Department of Molecular Microbiology and Immunology, Johns Hopkins Malaria  
11 Research Institute, Johns Hopkins Bloomberg School of Public Health, Johns Hopkins  
12 University, Baltimore, Maryland, USA<sup>a</sup>; Department of Infectious Disease Immunology,  
13 Statens Serum Institut, Copenhagen, Denmark<sup>b</sup>; Gennova Biopharmaceuticals Ltd., Pune,  
14 India<sup>c</sup>; PATH Malaria Vaccine Initiative, Washington DC, USA<sup>d</sup>

15

16 Running Head: Protective antibody and CD8<sup>+</sup> T cells against malaria

17 \*Present address: Diego A. Espinosa, Division of Infectious Diseases and Vaccinology,  
18 School of Public Health, University of California, Berkeley, Berkeley, California, USA

19 #Address correspondence to Fidel Zavala, fzavala1@jhu.edu

20 Keywords: malaria, vaccine, adjuvant, CD8<sup>+</sup> T cells, antibodies, *P. falciparum*,  
21 circumsporozoite protein

22

23

24  
25  
26  
27  
28  
29  
30  
31  
32  
33  
34

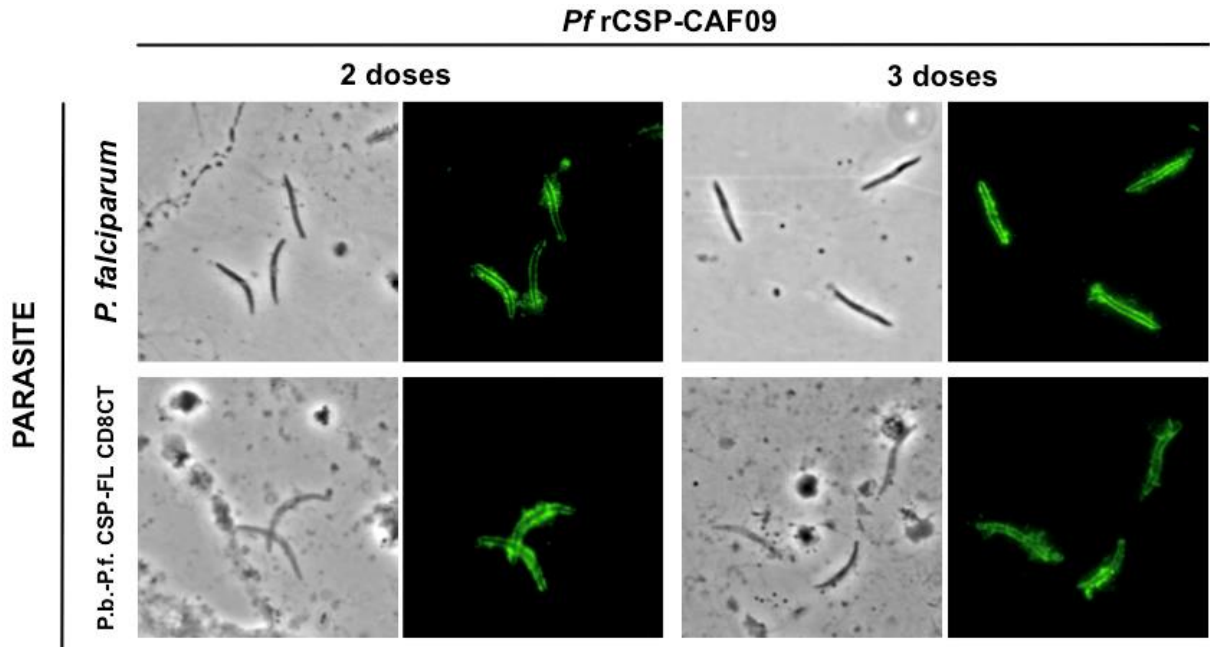

35 **Supplementary figure 1** *Binding of polyclonal sera from Pf rCSP-CAF09-immunized*  
36 *mice to P. falciparum and P.b.-P.f. CSP-FL CD8CT transgenic sporozoites.* Sera from  
37 mice that received either 2 or 3 doses of Pf rCSP-CAF09 bind air-dried sporozoites with  
38 comparable efficiency, as determined by IFA. Images are representative of 1:16000 sera  
39 dilutions. Abbreviations: Pf rCSP-CAF09, *P. falciparum* recombinant circumsporozoite  
40 protein in adjuvant CAF09; P.b.-P.f. CSP-FL CD8CT, *P. berghei*-*P. falciparum* CSP  
41 full-length CD8 epitope C-terminus transgenic parasite; IFA, immunofluorescence assay.

42  
43  
44  
45

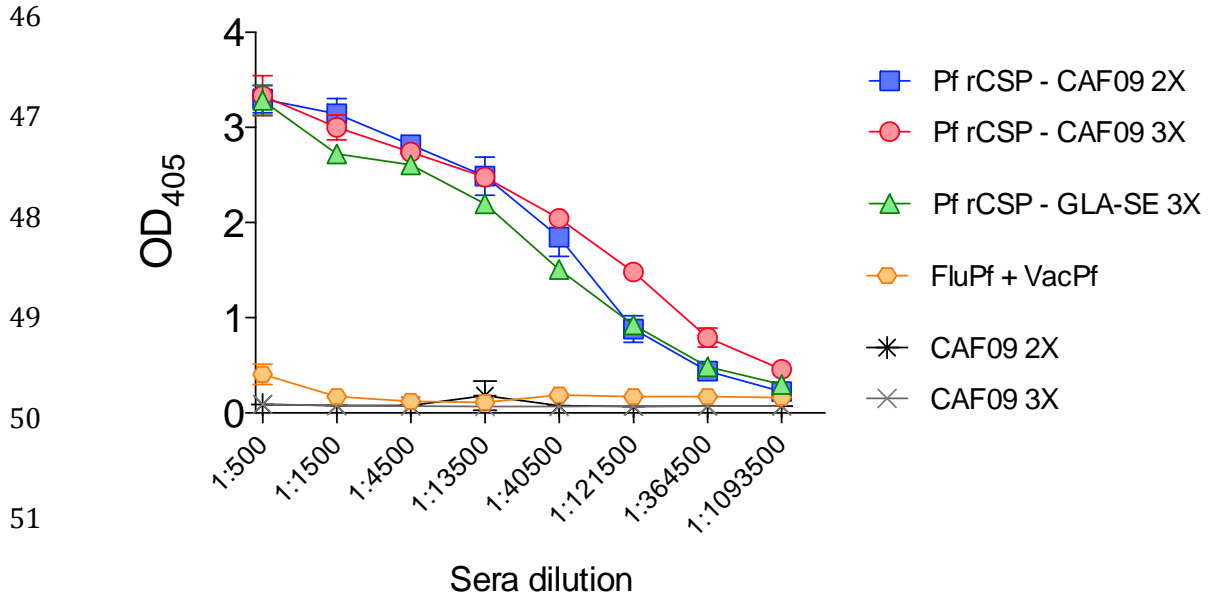

53 **Supplementary figure 2** Comparison of antibody titers against the *Pf* CSP repeat  
 54 region. Pooled serum samples from mice immunized with Pf rCSP-CAF09, Pf rCSP-  
 55 GLA-SE, recombinant FluPf and VacPf viruses or CAF09 adjuvant (n=5 per group) were  
 56 serially diluted and tested by ELISA against a synthetic peptide representing the *P.*  
 57 *falciparum* CSP repeat region [NANP]<sub>7</sub>. Anti-CSP IgG titers from mice immunized with  
 58 Pf rCSP-CAF09 and Pf rCSP-GLA-SE were comparable, while FluPf and VacPf  
 59 immunizations induced minimal antibody responses. Abbreviations: Pf rCSP-CAF09, *P.*  
 60 *falciparum* recombinant circumsporozoite protein in adjuvant CAF09; Pf rCSP-GLA-SE,  
 61 *P. falciparum* recombinant circumsporozoite protein in adjuvant GLA-SE; FluPf,  
 62 recombinant Influenza virus expressing a region of the *P. falciparum* CSP C-terminus Pf;  
 63 VacPf, recombinant Vaccinia virus expressing the full-length *P. falciparum* CSP; ELISA,  
 64 enzyme-linked immunosorbent assay; OD, optical density.

65

66  
67  
68  
69  
70  
71  
72  
73  
74  
75  
76  
77  
78  
79  
80  
81  
82  
83  
84  
85  
86

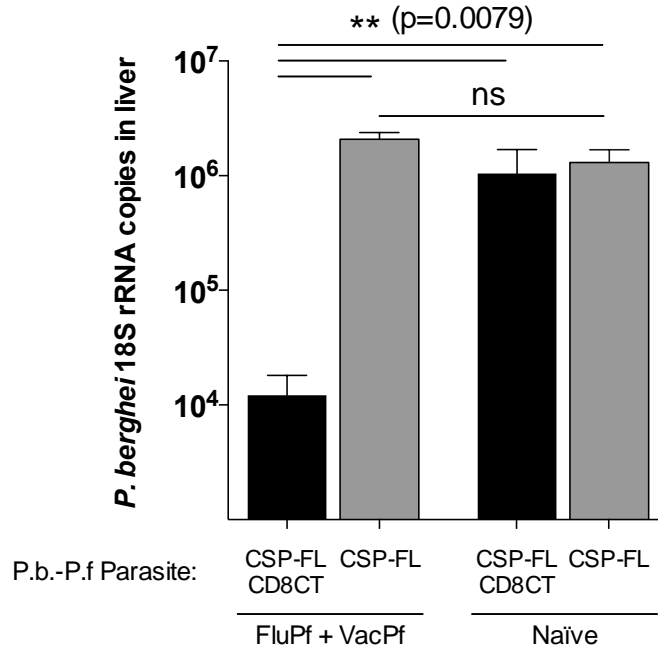

**Supplementary figure 3** Parasite liver burdens in mice immunized with recombinant *FluPf* and *VacPf* viruses. Mice immunized with recombinant *FluPf* and *VacPf* viruses were challenged against transgenic *P. berghei-P. falciparum* (*P.b-P.f.*) parasites expressing the full-length *P. falciparum* 3D7 CSP containing the murine Class I MCH epitope <sub>359</sub>DYENDIEKKI<sub>368</sub> (CSP-FL CD8CT) or the wild-type full-length *P. falciparum* 3D7 CSP (CSP-FL), which does not incorporate the cytotoxic epitope. Parasite liver loads of immunized mice challenged against *P.b-P.f.* CSP-FL CD8CT parasites were significantly lower than those of immunized mice challenged against *P.b-P.f.* CSP-FL sporozoites or naïve controls. Abbreviations: *P.b.-P.f.* CSP-FL CD8CT, *P. berghei-P. falciparum* CSP full-length CD8 epitope C-terminus transgenic parasite; *P.f.* CSP-FL, *P. berghei-P. falciparum* CSP full-length transgenic parasite; *FluPf*, recombinant influenza virus expressing *P. falciparum* CSP regions; *VacPf*, recombinant vaccinia virus expressing the *P. falciparum* CSP; rRNA, ribosomal RNA; RT-qPCR reverse-transcription quantitative real-time polymerase chain reaction.

87

A

88

89

90

91

92

93

94

95

96

97 **Supplementary figure 4** Development of *P.b.-P.f.* CSP-FL CD8CT transgenic parasites.98 (A) Scheme representing the strategy for replacing the CSP gene of GFP-Luciferase *P.*99 *berghei* (ANKA) with the *P. falciparum* (3D7) CSP incorporating the *P. berghei* signal

100 sequence. The star symbol (☆) represents the location of the introduced nucleotide change

101 to generate the CD8<sup>+</sup> T-cell epitope DYENDIEKKI. The annealing sites of the PCR

102 primers used to verify recombination at the CSP locus are indicated below. Restriction

103 sites shown are B – BbsI; K – KpnI; Ka – KasI; P – PacI; X – XhoI.

104

105

106

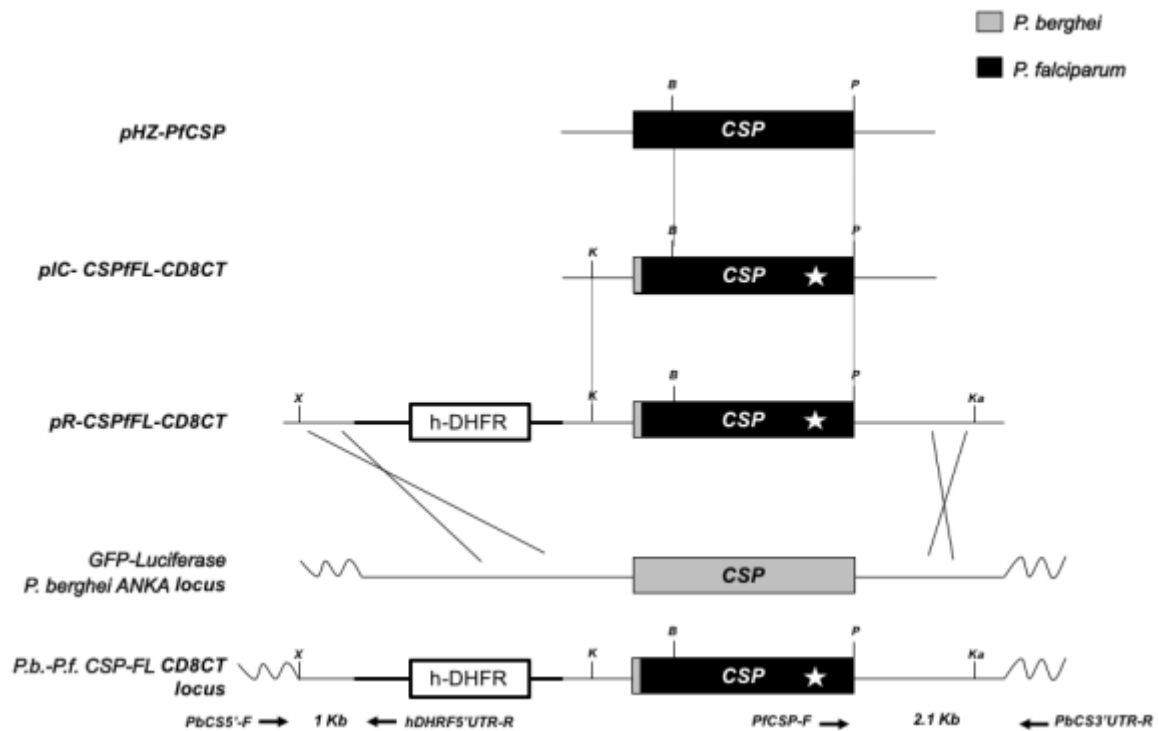

107

**B**

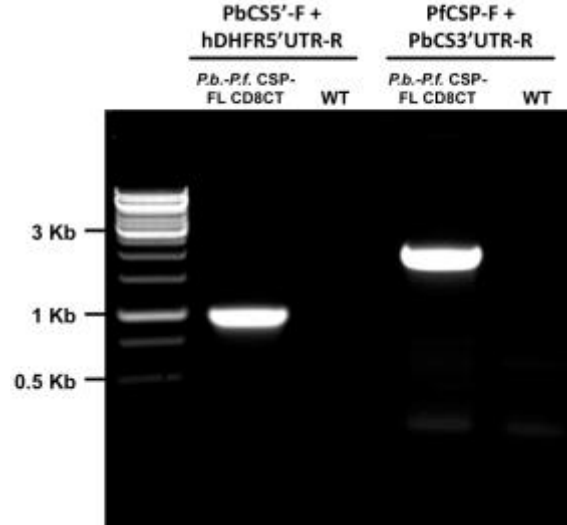

108

109

110

111

112

113

114

115

**C**

116

```

1  MKKCTILVVA  SLLLVNSLLP  GYGCYGSSSN  TRVLNELNYD  NAGTNLYNEL  50
51  EMNYYGKQEN  WYSLKKNRSR  LGENDDGNEE  DNEKLRKPKH  KKLKQPADGN  100
101 PDPNANPNVD  PNANPNVDPN  ANPNVDPNAN  PNANPNANPN  ANPNANPNAN  150
151 PNANPNANPN  ANPNANPNAN  PNANPNANPN  ANPNANPNAN  PNANPNVDPN  200
201 ANPNANPNAN  PNANPNANPN  ANPNANPNAN  PNANPNANPN  ANPNANPNAN  250
251 PNANPNANPN  ANPNANPNAN  PNKNNQGNGQ  GHNMPNDPNR  NVDENANANS  300
301 AVKNNNNEEP  SDKHIKEYLN  KIQNSLSTEW  SPCSVTCGNG  IQVRIKPGSA  350
351 NKPKDELDYE  NDIEKKICKM  EKCSSVFNVV  NSSIGLIMVL  SFLFLN*396

```

120

121 **Supplementary figure 4** *Development of P.b.-P.f. CSP-FL CD8CT transgenic parasites.*

122 **(B)** Using genomic DNA from *P.b.-P.f.* CSP-FL CD8CT transgenic parasites, 5' and 3'

123 integration at the CSP locus was verified by PCR. Primers PbCS5'-F and hDHFR5'UTR-

124 R yield a 1000 bp product; primers PfCSP-F and PbCS3'UTR-R yield a 2100 bp product.

125 **(C)** Amino acid sequence of CSP in the *P.b.-P.f.* CSP-FL CD8CT parasite. The *P.*

126 *berghei* signal sequence is depicted in gray text while the *P. falciparum* residues are

127 represented in black text. The amino acid replacement (Ala (A) to Glu (E)) introduced to

128 generate the cytotoxic epitope DYENDIEKKI is underlined.

| <b>Parasite</b>               | <b>% Midgut infected</b> | <b>Oocysts/ midgut</b> | <b>% Salivary glands infected</b> | <b>Spz/Salivary gland (x 10<sup>3</sup>)</b> | <b>% of infected mice after mosquito bites<sup>B</sup></b> |
|-------------------------------|--------------------------|------------------------|-----------------------------------|----------------------------------------------|------------------------------------------------------------|
| <i>P.b.-P.f. CSP-FL CD8CT</i> | <b>87.50</b>             | <b>60.33</b>           | <b>80</b>                         | <b>9.5</b>                                   | <b>100%</b>                                                |
| <i>P. berghei ANKA</i>        | <b>80.20</b>             | <b>55.25</b>           | <b>75</b>                         | <b>10</b>                                    | <b>100%</b>                                                |

129

130 **Supplementary table 1** *Developmental characteristics and infectivity of P.b.-P.f. CSP-FL CD8CT transgenic parasites in A.*  
131 *stephensi* mosquitoes<sup>A</sup>. P.b.-P.f. CSP-FL CD8CT transgenic parasites have similar developmental characteristics as wild-type *P.*  
132 *berghei ANKA* parasites.

133 <sup>A</sup> Mean of 3 experiments, with at least 20 mosquitoes examined in each experiment.

134 <sup>B</sup> Three infected mosquitoes were allowed to feed on C57BL/6 mice (n=5) for 3 minutes. Blood stage parasitemia was assessed 5 days  
135 later.

136

137

138

139

140

**TREATMENT**

141

142

143

144

145

146

147

148

149

150

151

152

153

154

155

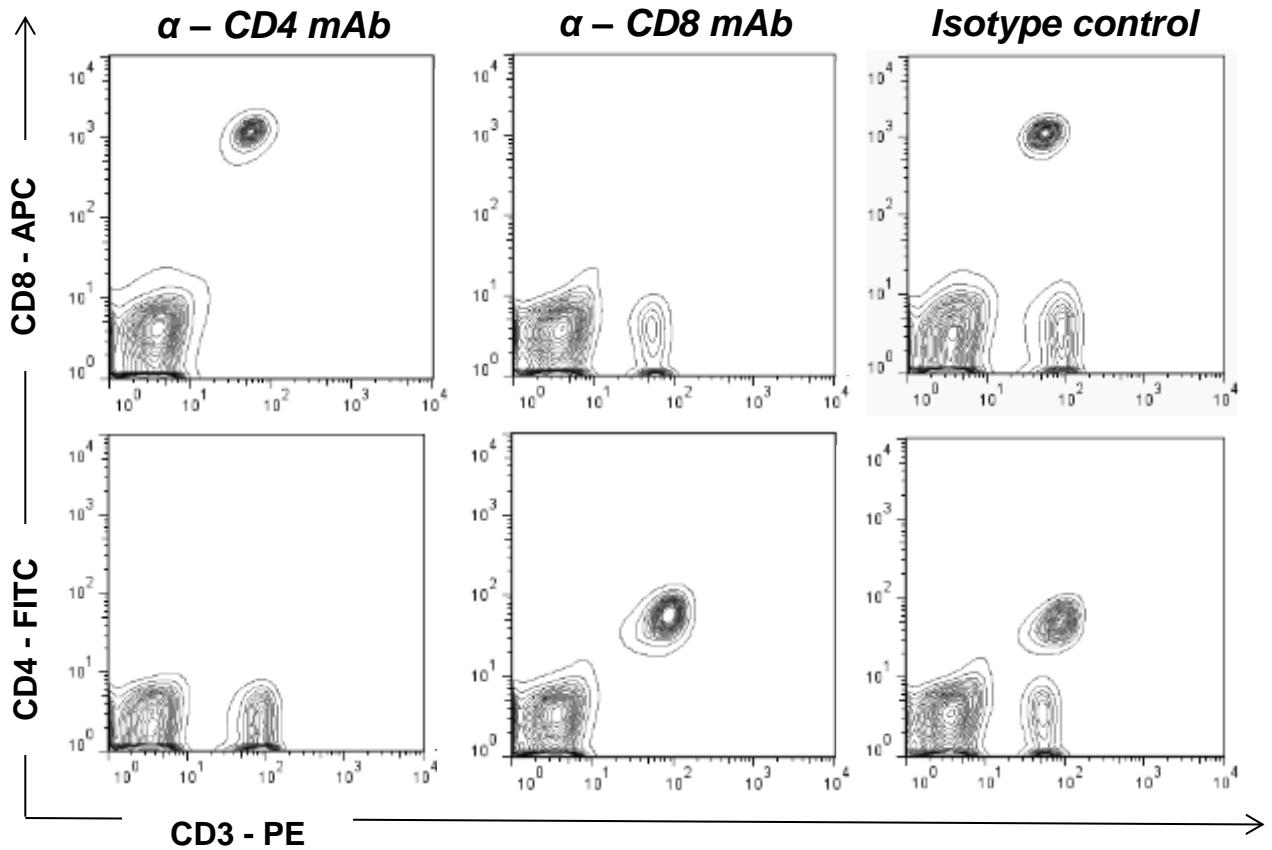

156 **Supplementary figure 5** Depletion of T cells by monoclonal antibody treatment. Single-

157 cell suspensions ( $5 \times 10^5$  cells) were harvested from the spleens of treated mice. Surface

158 staining was performed with anti-CD3-PE, anti-CD4-FITC and anti-CD8-APC antibodies

159 prior to flow cytometry analysis. Anti-CD4 and anti-CD8 antibody treatment efficiently

160 depleted CD4<sup>+</sup> and CD8<sup>+</sup> T-cells, respectively. Abbreviations:  $\alpha$ -CD4 mAb, anti-CD4

161 monoclonal antibody;  $\alpha$ -CD8 mAb, anti-CD8 monoclonal antibody; PE, Phycoerythrin;

162 FITC, Fluorescein isothiocyanate; APC, Allophycocyanin.
